# Supplementary material for: Assembly of tetra-nuclear YbIII-containing selenotungstate clusters: synthesis, structures, and magnetic properties
Source: Royal Society of Chemistry journal article supplement (doi:10.1039/d1dt01282g), 2021-01-01
Supplement: d1dt01282g1.pdf [file d1dt01282g1.pdf]

## Supporting Information

# Assembly of Tetra-Nuclear Yb<sup>III</sup>-Containing Selenotungstate Clusters: Synthesis, Structures, and Magnetic Properties

Li-Zhi Han,<sup>a</sup> Cheng-Qi Jiao,<sup>b</sup> Wei-Chao Chen,<sup>\*c</sup> Kui-Zhan Shao,<sup>c</sup> Long-Yi Jin,<sup>\*a</sup> and Zhong-Min Su<sup>a</sup>

<sup>a</sup>Department of Chemistry, College of Science, Yanbian University, Yanji 133002, People's Republic of China

E-mail: lyjin@ybu.edu.cn

<sup>b</sup>Liaoning Normal University Liaoning Normal Univ, Sch Chem & Chem Engn, Huanghe Rd 850, Dalian 116029, Peoples R China

<sup>c</sup>Key Laboratory of Polyoxometalate and Reticular Material Chemistry of Ministry of Education, Northeast Normal University Ren Min Street No. 5268 Changchun, Jilin, 130024 P. R. China

E-mail: chenwc061@nenu.edu.cn

### CONTENTS

**Section 1 A detailed survey of the lanthanoid-containing selenotungstates**

**Section 2 Structures**

**Section 3 Experimental Section**

**Section 4 Supplementary Physical Characterizations**

## Section 1 A detailed survey of the lanthanoid-containing selenotungstates

**Table S1.** A detailed survey of the lanthanoid-containing selenotungstates.

| Year | Lanthanoid ions | Formula                                                                                                                                                                                                                                                                                                                                                                                          | properties                                                          | Ref. |
|------|-----------------|--------------------------------------------------------------------------------------------------------------------------------------------------------------------------------------------------------------------------------------------------------------------------------------------------------------------------------------------------------------------------------------------------|---------------------------------------------------------------------|------|
| 2013 | Ce              | $K_{32}Na_{16}[\{(SeO_3)W_{10}O_{34}\}_8\{Ce_8(H_2O)_{20}\}(WO_2)_4(W_4O_{12})\} \cdot 81H_2O$ $K_{32}Na_{16}[\{(TeO_3)W_{10}O_{34}\}_8\{Ce_8(H_2O)_{20}\}(WO_2)_4(W_4O_{12})\} \cdot 114H_2O$ $K_{12}Na_{22}[\{(SeO_3)W_{10}O_{34}\}_8\{Ce_8(H_2O)_{20}\}(WO_2)_4\{(W_4O_6)Ce_4(H_2O)_{14}(SeO_3)_4(NO_3)_2\}\} \cdot 79H_2O$                                                                   | the formation of inorganic hollow spheres in dilute solution        | 1    |
| 2014 | Ce              | $(C_2H_8N)_4K_3Na_{10}[\{\alpha-SeW_9O_{33}\}_2\{Ce_2(CH_3COO)(H_2O)_3W_3O_6\}\{\alpha-Se_2W_{14}O_{52}\}] \cdot 26H_2O;$ $K_{10}Na_5[\{\alpha-SeW_9O_{33}\}_2\{Ce_2(H_2O)_4W_3O_6\}\{\alpha-Se_2W_{14}O_{51}(OH)\}] \cdot 24H_2O$                                                                                                                                                               | DFT for the investigations of electronic properties                 | 2    |
| 2015 | Ce              | $K_6Na_{16}[Ce_6Se_6W_{67}O_{230}(OH)_6(H_2O)_{17}] \cdot 47H_2O;$ $K_9Na_5Ce(H_2O)_4[Ce_6Se_{10}W_{51}O_{187}(OH)_7(H_2O)_{18}] \cdot 45H_2O$                                                                                                                                                                                                                                                   | electrochemical properties                                          | 3    |
| 2015 | Ce              | $Na_{13}H_7[Ce(SeW_{17}O_{59})_2] \cdot 31H_2O$                                                                                                                                                                                                                                                                                                                                                  | electrochemical properties                                          | 4    |
| 2017 | La, Ce          | $[H_2N(CH_3)_2]_{16}Na_9LnH_{10}\{[W_{16}Ln_{10}(H_2O)_{38}O_{50}][B-\alpha-SeW_9O_{33}]_8\} \cdot 56H_2O;$ $[H_2N(CH_3)_2]_{22}Na_4H_{12}\{[W_{18}Ln_{10}(H_2O)_{34}O_{56}][B-\alpha-SeW_9O_{33}]_8\} \cdot 80H_2O$                                                                                                                                                                             | variable-temperature IR spectra and PXRD patterns                   | 5    |
| 2017 | Pr              | $Cs_2Na_4H_{12}\{[Pr_3(H_2O)_{10}][Se_2W_{22}O_{76}(gly)_2]\}_2(Se_2W_7O_{30}H_2) \cdot 25H_2O$                                                                                                                                                                                                                                                                                                  | H <sub>2</sub> O <sub>2</sub> -based catalytic epoxidation property | 6    |
| 2018 | Tb, Dy          | $[H_2N(CH_3)_2]_2Na_9K_2H_{19}\{[Ln_4W_4Se_4O_{22}(H_2O)_5](Se_2W_{14}O_{52})_2\} \cdot 60H_2O$                                                                                                                                                                                                                                                                                                  | solid-state luminescent spectra                                     | 7    |
| 2019 | Gd, Dy          | $[H_2N(CH_3)_2]_{10}H_3[SeO_4Ln_5(H_2O)_7(Se_2W_{14}O_{52})_2] \cdot 40H_2O$                                                                                                                                                                                                                                                                                                                     | luminescence properties                                             | 8    |
| 2019 | Ce              | $[HDMEA][H_2N(CH_3)_2]_4H_3Na_4[Ce_2(H_2O)_6(DMEA)W_4O_9(\alpha-SeW_9O_{33})_3] \cdot 26H_2O;$ $[H_2N(CH_3)_2]_{10}H_4Na_{10}[Ce_2W_4O_9(H_2O)_7(\alpha-SeW_9O_{33})_3] \cdot 63H_2O$                                                                                                                                                                                                            | the oxidation of aromatic sulfides                                  | 9    |
| 2019 | Gd, Tb, Dy      | $(C_4H_{10}NO)_9Na_3[Dy_3Se_{3.5}W_{30}O_{107.5}(H_2O)_{10}] \cdot 22H_2O;$ $(NH_4)_3(C_2H_8N)Na_2[Dy_4Se_6W_{38}O_{132}(H_2O)_{26}(OH)_6] \cdot 18H_2O;$ $(NH_4)_4Na_8[Gd_4Se_6W_{48}O_{166}(H_2O)_{20}(OH)_4] \cdot 21H_2O;$ $(NH_4)_9(C_2H_8N)_4Na_5[Ln_6Se_6W_{58}O_{202}(H_2O)_{20}(OH)_4] \cdot 58H_2O;$ $(NH_4)_4(C_2H_8N)_5Na_{13}[Ln_4Se_8W_{56}O_{196}(H_2O)_x(OH)_{10}] \cdot 40H_2O$ | magnetic behaviors                                                  | 10   |

|      |                                |                                                                                                                                                                                                                                                    |                                            |           |
|------|--------------------------------|----------------------------------------------------------------------------------------------------------------------------------------------------------------------------------------------------------------------------------------------------|--------------------------------------------|-----------|
| 2020 | Ho, Er, Tb, Tm                 | $[H_2N(CH_3)_2]_{10}H_3[SeO_4Ln_5(H_2O)_7(Se_2W_{14}O_{52})_2] \cdot 40H_2O$                                                                                                                                                                       | luminescence properties                    | 11        |
| 2020 | Nd                             | $Na_9K_8\{[W_3Nd_2(H_2O)_3(NO_3)O_6](B-\alpha-SeW_9O_{33})_2(\alpha-Se_2W_{14}O_{52})\} \cdot 35H_2O;$<br>$[H_2N(CH_3)_2]_7H_9Na_4\{[W_2Nd_2(H_2O)_8O_6(OH)_2(\beta-Se_2W_{14}O_{52})][W_3Nd_2(H_2O)_6O_7(B-\alpha-SeW_9O_{33})_2]\} \cdot 84H_2O$ | catalytic oxidation of aromatic thioethers | 12        |
| 2020 | Eu                             | $[H_2N(CH_3)_2]_{10}H_3\{SeO_4Eu_5(H_2O)_8[Se_2W_{14}O_{52}]_2\} \cdot 40H_2O$                                                                                                                                                                     | luminescence properties                    | 13        |
| 2020 | Ce, Pr, Nd, Sm, Gd, Tb, Ho, Er | $[H_2N(CH_3)_2]_{12}Na_2[Ln_2(H_2O)_7(W_4O_9)(HPSeW_{15}O_{54})(SeW_9O_{33})_2] \cdot 44H_2O$                                                                                                                                                      | electrochemical sensing properties         | 14        |
| 2020 | Ce                             | $Na_{16}H_6\{[Ce_3W_4O_{10}(H_2O)_9(CH_3COO)_3]_2(Se_2W_7O_{30})(B-\alpha-SeW_9O_{33})_4\} \cdot (C_5H_8NBO_3) \cdot 119H_2O$                                                                                                                      | electrochemical sensing properties         | 15        |
| 2021 | Yb                             | $(C_2H_8N)_6Na_{14}[Yb_4Se_6W_{44}O_{160}(H_2O)_{12}] \cdot 40H_2O;$<br>$(C_2H_8N)_4Na_{14}[Yb_4Se_6W_{45}O_{159}(OH)_6(H_2O)_{11}] \cdot 38H_2O$                                                                                                  | single molecule magnets                    | This work |

## REFERENCES

- (1) Chen, W.-C.; Li, H.-L.; Wang, X.-L.; Shao, K.-Z.; Su, Z.-M.; Wang, E.-B. Assembly of cerium(III)-stabilized polyoxotungstate nanoclusters with  $SeO_3^{2-}/TeO_3^{2-}$  templates: from single polyoxoanions to inorganic hollow spheres in dilute solution. *Chem. Eur. J.* **2013**, *19*, 11007-11015.
- (2) Chen, W.-C.; Yan, L.-K.; Wu, C.-X.; Wang, X.-L.; Shao, K.-Z.; Su, Z.-M.; Wang, E.-B. Assembly of Keggin-/Dawson-type polyoxotungstate clusters with different metal units and  $SeO_3^{2-}$  heteroanion templates. *Cryst. Growth Des.* **2014**, *14*, 5099-5110.
- (3) Chen, W.-C.; Qin, C.; Li, Y.-G.; Zang, H.-Y.; Shao, K.-Z.; Su, Z.-M.; Wang, E.-B. Assembly of large purely inorganic Ce-stabilized/bridged selenotungstates: from nanoclusters to layers. *Chem. Asian J.* **2015**, *10*, 1184-1191.
- (4) Li, H.; Yang, W.; Chai, Y.; Chen, L.; Zhao, J. A novel Dawson-like cerium(IV)-hybridizing selenotungstate  $Na_{13}H_7[Ce(SeW_{17}O_{59})_2] \cdot 31H_2O$ . *Inorg. Chem. Commun.* **2015**, *56*, 35-40.
- (5) Liu, Y.; Li, H.; Lu, C.; Gong, P.; Ma, X.; Chen, L.; Zhao, J. Organocounterions-assisted and pH-controlled self-assembly of five nanoscale high-Nuclear lanthanide substituted heteropolytungstates. *Cryst. Growth Des.* **2017**, *17*, 3917-3928.
- (6) Yang, L.; Li, L.; Guo, J.; Liu, Q.; Ma, P.; Niu, J.; Wang, J. A nanosized gly-decorated praseodymium-stabilized selenotungstate cluster: synthesis, structure, and oxidation catalysis. *Chem. Asian J.* **2017**, *12*, 2441-2446.
- (7) Li, H.-L.; Liu, Y.-J.; Li, Y.-M.; Chen, L.-J.; Zhao, J.-W.; Yang, G.-Y. Unprecedented selenium and lanthanide simultaneously bridging selenotungstate aggregates stabilized by four tetravacant Dawson-like  $\{Se_2W_{14}\}$  units. *Chem. Asian J.* **2018**, *13*, 2897-2907.
- (8) Y. Zhang, Y. Li, J. Pang, Y. Liu, P. Li, L. Chen and J. Zhao, Two Penta-RE<sup>III</sup> Encapsulated Tetravacant Dawson Selenotungstates and Nanoscale Derivatives and Their Luminescence Properties, *Inorg. Chem.* **2019**, *58*, 7078–7090.
- (9) Li, H.-L.; Lian, C.; Chen, L.-J.; Zhao, J.-W.; Yang, G.-Y. Two Ce<sup>3+</sup>-substituted selenotungstates regulated by N,N-dimethylethanolamine and dimethylamine hydrochloride, *Inorg. Chem.* **2019**, *58*, 8442-8450.

- (10) W.-C. Chen, C.-Q. Jiao, X.-L. Wang, K.-Z. Shao and Z.-M. Su, Self-Assembly of Nanoscale Lanthanoid-Containing Selenotungstates: Synthesis, Structures, and Magnetic Studies, *Inorg. Chem.* **2019**, *58*, 12895–12904.
- (11) Y. Zhang, Y.-F. Liu, X. Xu, L.-J. Chen and J.-W. Zhao, Preparations, Structures and Luminescence Properties of Pentarare-earth Incorporated Tetravacant Dawson Selenotungstates and Their Ho<sup>3+</sup>/Tm<sup>3+</sup> Co-doped Derivatives, *Chem Asian J.* **2020**, *15*, 1156–1166.
- (12) H. Li, C. Lian, L. Chen, J. Zhao and G.-Y. Yang, Two unusual nanosized Nd<sup>3+</sup>-substituted selenotungstate aggregates simultaneously comprising lacunary Keggin and Dawson polyoxotungstate segments, *Nanoscale*, **2020**, *12*, 16091–16101.
- (13) Y. Zhang, B. Zeng, Y. Liu, P. Li, L. Chen and J. Zhao, A Penta-EuIII Sandwiched Dawson Selenotungstate and Its Unique Luminescence Properties, *Eur. J. Inorg. Chem.* **2020**, 3416–3425.
- (14) L. Liu, J. Jiang, X. Liu, G. Liu, D. Wang, L. Chen and J. Zhao, First series of mixed (P<sup>III</sup>, Se<sup>IV</sup>)-heteroatom-oriented rare-earth-embedded polyoxotungstates containing distinct building blocks, *Inorg. Chem. Front.*, **2020**, *7*, 4640–4651.
- (15) J. Jiang, L. Liu, G. Liu, D. Wang, Y. Zhang, L. Chen and J. Zhao, Organic–Inorganic Hybrid Cerium-Encapsulated Selenotungstate Including Three Building Blocks and Its Electrochemical Detection of Dopamine and Paracetamol, *Inorg. Chem.* **2020**, *59*, 15355–15364.

## Section 2 Structures

**Table S2.** Crystal Data and Structure Refinements for **1** and **2**.

|                                                                          | <b>1</b>                                                                                                                          | <b>2</b>                                                                                                                         |
|--------------------------------------------------------------------------|-----------------------------------------------------------------------------------------------------------------------------------|----------------------------------------------------------------------------------------------------------------------------------|
| Empirical formula                                                        | C <sub>12</sub> H <sub>152</sub> N <sub>6</sub> Na <sub>14</sub> O <sub>212</sub> Se <sub>6</sub> W <sub>44</sub> Yb <sub>4</sub> | C <sub>8</sub> H <sub>136</sub> N <sub>4</sub> Na <sub>14</sub> O <sub>214</sub> Se <sub>6</sub> W <sub>45</sub> Yb <sub>4</sub> |
| <i>M</i>                                                                 | 13350.57                                                                                                                          | 13474.23                                                                                                                         |
| $\lambda/\text{\AA}$                                                     | 0.71073                                                                                                                           | 0.71073                                                                                                                          |
| <i>T</i> /K                                                              | 296.15                                                                                                                            | 296.15                                                                                                                           |
| Crystal system                                                           | Orthorhombic                                                                                                                      | Triclinic                                                                                                                        |
| Space group                                                              | <i>Pbcn</i>                                                                                                                       | <i>P-1</i>                                                                                                                       |
| <i>a</i> /\AA                                                            | 50.919(2)                                                                                                                         | 17.1503(13)                                                                                                                      |
| <i>b</i> /\AA                                                            | 23.3103(8)                                                                                                                        | 25.581(2)                                                                                                                        |
| <i>c</i> /\AA                                                            | 20.2832(8)                                                                                                                        | 35.869(3)                                                                                                                        |
| $\alpha/^\circ$                                                          | 90                                                                                                                                | 93.152(2)                                                                                                                        |
| $\beta/^\circ$                                                           | 90                                                                                                                                | 99.869(2)                                                                                                                        |
| $\gamma/^\circ$                                                          | 90                                                                                                                                | 106.340(2)                                                                                                                       |
| <i>V</i> /\AA <sup>3</sup>                                               | 24074.8(16)                                                                                                                       | 14788(2)                                                                                                                         |
| <i>Z</i>                                                                 | 4                                                                                                                                 | 2                                                                                                                                |
| <i>D<sub>c</sub></i> /Mg m <sup>-3</sup>                                 | 3.683                                                                                                                             | 3.026                                                                                                                            |
| $\mu/\text{mm}^{-1}$                                                     | 23.499                                                                                                                            | 19.514                                                                                                                           |
| <i>F</i> (000)                                                           | 23424                                                                                                                             | 11784                                                                                                                            |
| 2 $\theta$ Range/ $^\circ$                                               | 3.584–49.998                                                                                                                      | 2.954–43.492                                                                                                                     |
| Measured reflections                                                     | 135589                                                                                                                            | 62674                                                                                                                            |
| Independent reflections                                                  | 21189                                                                                                                             | 34925                                                                                                                            |
| <i>R<sub>int</sub></i><br>after SQUEEZE                                  | 0.1655                                                                                                                            | 0.0963                                                                                                                           |
| Goodness-of-fit on <i>F</i> <sup>2</sup>                                 | 1.029                                                                                                                             | 1.018                                                                                                                            |
| <i>R</i> <sub>1</sub> ( <i>I</i> > 2 $\sigma$ ( <i>I</i> )) <sup>a</sup> | 0.0552                                                                                                                            | 0.0756                                                                                                                           |
| <i>wR</i> <sub>2</sub> (all data) <sup>b</sup>                           | 0.1392                                                                                                                            | 0.2282                                                                                                                           |

<sup>a</sup> $R_1 = \sum ||F_o| - |F_c|| / \sum |F_o|$ . <sup>b</sup> $wR_2 = \{\sum [w(F_o^2 - F_c^2)^2] / \sum [w(F_o^2)^2]\}^{1/2}$ .

**Single-crystal X-ray diffraction:** Single-crystal X-ray diffraction data for **1** and **2** were recorded on a Bruker Apex CCD II area-detector diffractometer with graphite-monochromated  $\text{Mo}_{K\alpha}$  radiation ( $\lambda = 0.71073 \text{ \AA}$ ) at 296(2) K. Absorption corrections were applied using multi-scan technique and performed by using the SADABS program (Sheldrick, G. *SADABS*; ver. 2.10; University of Gottingen: Göttingen, Germany, **2003**). The structures of **1** and **2** were solved by direct methods and refined on  $F^2$  by full-matrix leastsquares methods by using the Olex2 package (*J. Appl. Cryst.*, **2009**, 42, 339). CCDC number: 2067697 for **1**; 2067696 for **2**.

As for CCDC 2067696, about one  $\text{Na}^+$  and 3  $[\text{C}_2\text{H}_8\text{N}]^+$  cations as well as 5 water molecules were found from the Fourier maps, however, there are still accessible solvent voids in the crystal structure prompted by Checkcif report, indicating that some more cations and solvent molecules should exist in the structure, but cannot be found from the weak residual electron peaks. Based on the TGA curve, bond valence sum calculations, elemental analyses, another 33 water molecules, 13  $\text{Na}^+$ , one  $[\text{C}_2\text{H}_8\text{N}]^+$  cation and 34  $\text{H}^+$  were included into the molecular formula directly. Specifically, the 38 water molecules and 4 organic amine groups in this formula were confirmed by TGA curve, two successive weight decrease is the loss of water molecules and organic amine groups (Calcd: 7.91%; Found: 7.82%). Elemental analysis supports this molecular formula once again (Calcd: C 0.71, N 0.42, Na 2.39, Yb 5.14, Se 3.52, W 61.4 %; Found C 0.69, N 0.50, Na 2.88, Yb 5.06, Se 3.49, W 60.8 %). In all, the molecular formula was defined as  $(\text{C}_2\text{H}_8\text{N})_4\text{Na}_{14}[\text{Yb}_4\text{Se}_6\text{W}_{45}\text{O}_{159}(\text{OH})_6(\text{H}_2\text{O})_{11}]\cdot 38\text{H}_2\text{O}$  according to single crystal analysis, charge balance, TGA curve as well as elemental analyses.

As for CCDC 2067697, about one  $\text{Na}^+$  and 4  $[\text{C}_2\text{H}_8\text{N}]^+$  cations as well as 9 water molecules were found from the Fourier maps, however, there are still accessible solvent voids in the crystal structure prompted by Checkcif report, indicating that some more cations and solvent molecules should exist in the structure, but cannot be found from the weak residual electron peaks. Based on the TGA curve, bond valence sum calculations, elemental analyses, another 31 water molecules, 13  $\text{Na}^+$ , 2  $[\text{C}_2\text{H}_8\text{N}]^+$  cations and 40  $\text{H}^+$  were included into the molecular formula directly. Specifically, the 40 water molecules and 6 organic amine groups in this formula were confirmed by TGA curve, two successive weight decrease is the loss of water molecules and organic amine groups (Calcd: 9.08%; Found: 8.93%). Elemental analysis supports this molecular formula once again (Calcd: C 1.08, N 0.63, Na 2.41, Yb 5.18, Se 3.55, W 60.6 %; Found C 0.98, N 0.67, Na 2.98, Yb 5.13, Se 3.31, W 59.9 %). In all, the molecular formula was defined as  $(\text{C}_2\text{H}_8\text{N})_6\text{Na}_{14}[\text{Yb}_4\text{Se}_6\text{W}_{44}\text{O}_{160}(\text{H}_2\text{O})_{12}]\cdot 40\text{H}_2\text{O}$  according to single crystal analysis, charge balance, TGA curve as well as elemental analyses.

**Table S3.** Bond lengths [Å] for the Yb atoms in **1–2**.

| 1            |           |              |           |
|--------------|-----------|--------------|-----------|
| Yb(1)-O(8)   | 2.382(15) | Yb(2)-O(34)  | 2.273(15) |
| Yb(1)-O(16)  | 2.302(15) | Yb(2)-O(40)  | 2.385(16) |
| Yb(1)-O(25)  | 2.339(15) | Yb(2)-O(51)  | 2.292(16) |
| Yb(1)-O(30)  | 2.316(15) | Yb(2)-O(69)  | 2.317(15) |
| Yb(1)-O(53)  | 2.314(17) | Yb(2)-O(73)  | 2.314(17) |
| Yb(1)-O(70)  | 2.283(16) | Yb(2)-O(81)  | 2.321(16) |
| Yb(1)-O(79)  | 2.337(16) | Yb(2)-O(82)  | 2.311(16) |
| Yb(1)-O(80)  | 2.346(17) | Yb(2)-O(83)  | 2.370(18) |
| 2            |           |              |           |
| Yb(1)-O(22)  | 2.26(3)   | Yb(2)-O(2)   | 2.23(3)   |
| Yb(1)-O(44)  | 2.19(2)   | Yb(2)-O(35)  | 2.29(3)   |
| Yb(1)-O(50)  | 2.30(3)   | Yb(2)-O(37)  | 2.35(4)   |
| Yb(1)-O(95)  | 2.30(3)   | Yb(2)-O(110) | 2.25(3)   |
| Yb(1)-O(117) | 2.21(4)   | Yb(2)-O(123) | 2.24(3)   |
| Yb(1)-O(145) | 2.36(4)   | Yb(2)-O(174) | 2.34(3)   |
| Yb(1)-O(159) | 2.27(2)   | Yb(2)-O(154) | 2.34(3)   |
| Yb(3)-O(65)  | 2.27(3)   | Yb(4)-O(20)  | 2.27(3)   |
| Yb(3)-O(67)  | 2.20(4)   | Yb(4)-O(22)  | 2.15(3)   |
| Yb(3)-O(69)  | 2.35(4)   | Yb(4)-O(63)  | 2.29(4)   |
| Yb(3)-O(75)  | 2.42(4)   | Yb(4)-O(77)  | 2.29(3)   |
| Yb(3)-O(96)  | 2.26(3)   | Yb(4)-O(84)  | 2.28(3)   |
| Yb(3)-O(123) | 2.12(3)   | Yb(4)-O(136) | 2.26(3)   |
| Yb(3)-O(149) | 2.35(3)   | Yb(4)-O(162) | 2.27(3)   |

**Table S4.** The BVS calculation results of all the oxygen atoms in **2**.

| Oxygen Code                        | Bond Valence | Protonation Degree | Oxygen Code      | Bond Valence | Protonation Degree |
|------------------------------------|--------------|--------------------|------------------|--------------|--------------------|
| O <sub>15</sub>                    | 1.349        | 1                  | O <sub>109</sub> | 1.422        | 1                  |
| O <sub>156</sub>                   | 1.372        | 1                  | O <sub>105</sub> | 0.355        | 2                  |
| O <sub>73</sub>                    | 1.372        | 1                  | O <sub>123</sub> | 0.778        | 1                  |
| O <sub>22</sub>                    | 0.737        | 1                  |                  |              |                    |
| <b>Total 8 protons per cluster</b> |              |                    |                  |              |                    |

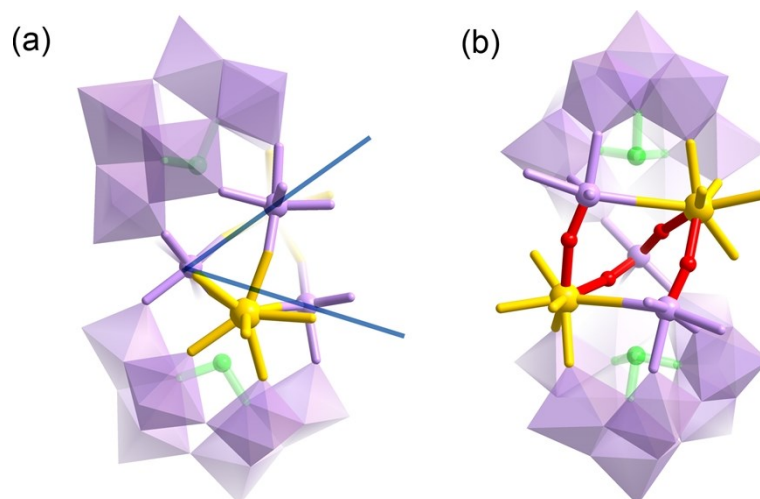

**Fig. S1** The twist angle (a) and four Yb-O-W linkages (b, red bonds) in dimeric {Yb<sub>2</sub>Se<sub>2</sub>W<sub>21</sub>} subunit. Color code: W (purple); Se (green); Yb (yellow).

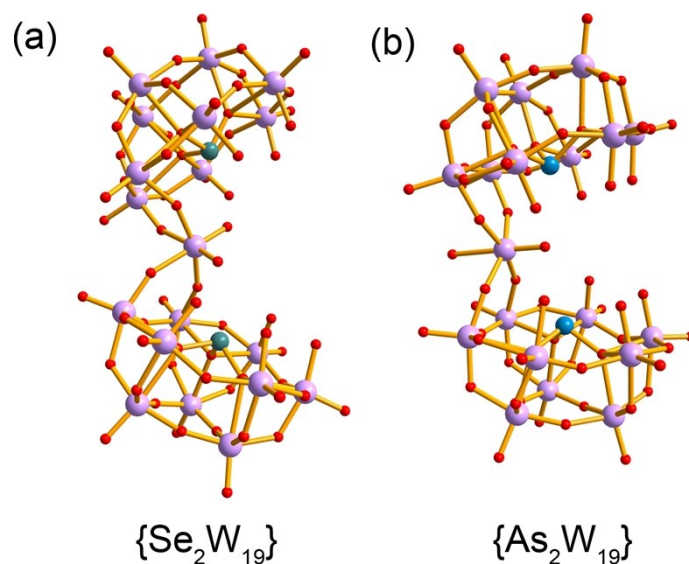

**Fig. S2** The open pocket-like fragments of [Se<sub>2</sub>W<sub>19</sub>O<sub>68</sub>]<sup>14-</sup> (a) and [As<sub>2</sub>W<sub>19</sub>O<sub>68</sub>]<sup>16-</sup> (b). Color code: W (purple); Se or As (blue); O (red).



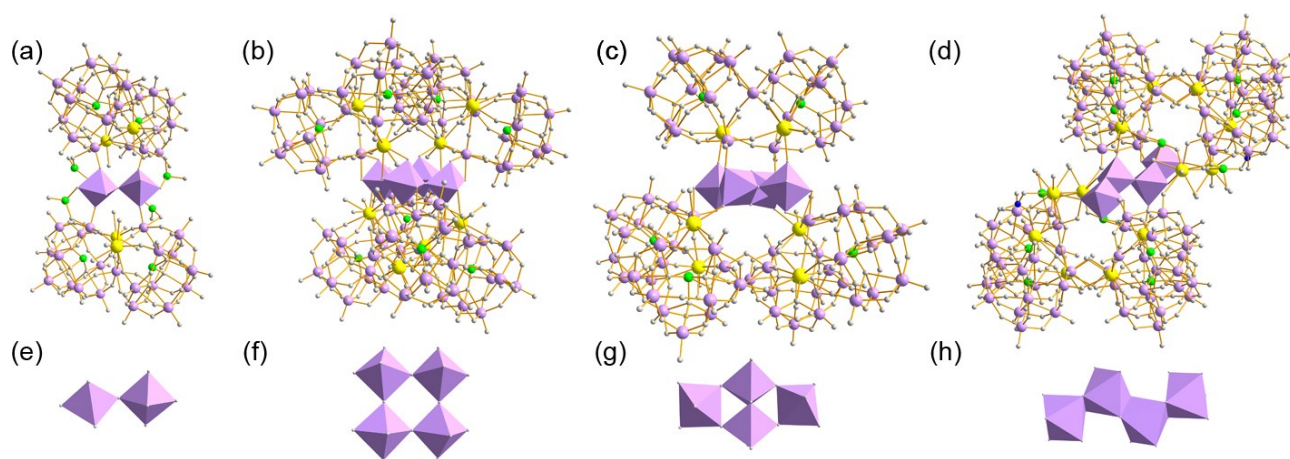

**Fig. S3** Dimeric (a), trimeric (c) or tetrameric (b,d) Ln-containing selenotungstates based on three or four  $\{\text{Yb}_2\text{Se}_2\text{W}_{21}\}$  subunits fixed by  $\{\text{W}_2\text{O}_7\}$  (e) or  $\{\text{W}_4\}$  linkers (f, g and h), respectively. Color code: W (purple); Se (green); Yb or Ce (yellow); O (gray).

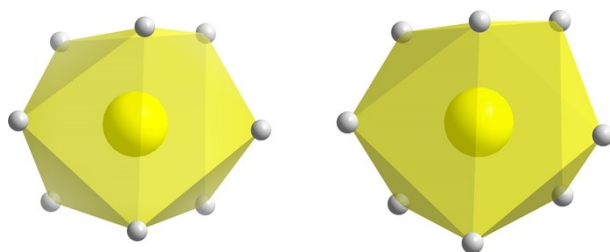

**Fig. S4** The distorted square antiprismatic geometries of  $\text{Yb}^{\text{III}}$  centers. Color code: Yb (yellow); O (gray).

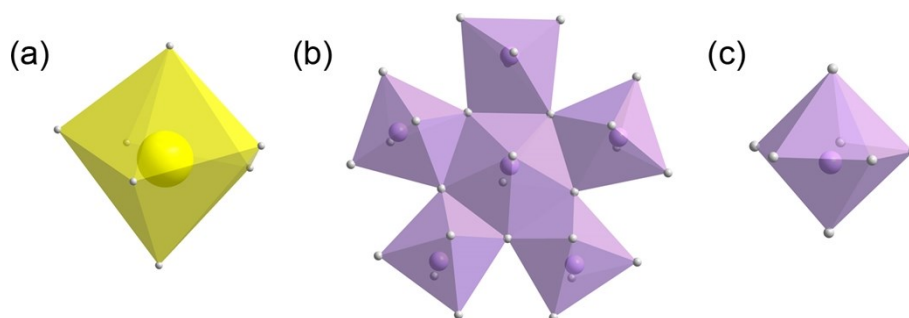

**Fig. S5** The pentagonal bipyramidal geometry of Yb center (a) and molybdenum  $\{\text{Mo}(\text{Mo}_5)\}$  or tungsten  $\{\text{W}(\text{W}_5)\}$  centers (b,c). Color code: W or Mo (purple); Yb (yellow); O (gray).

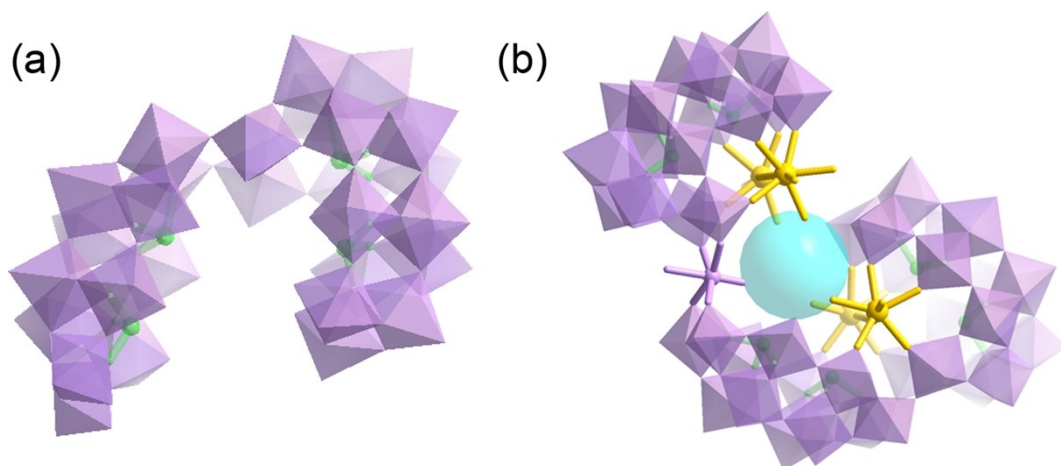

**Fig. S6** Polyhedral and ball-and-stick representation of opening  $\{\text{Se}_4\text{W}_{28}\}$  subunit (a) and the “cavity” in **2a** with a half-“S”-shaped configuration (b). Color code: W (purple); Se (green); Yb (yellow).

**Table S5.** Lanthanide geometry analysis of **1** by using the Shape software.

| Ideal shape                 | Octagon  | Heptagonal pyramid | Hexagonal bipyramid | Cube   | Square antiprism | Triangular dodecahedron | Johnson gyrobifastigium | Johnson elongated triangular bipyramid | Biaugmented trigonal prism | Biaugmented trigonal prism | Snub diphenoind | Triakis tetrahedron | Elongated trigonal bipyramid |
|-----------------------------|----------|--------------------|---------------------|--------|------------------|-------------------------|-------------------------|----------------------------------------|----------------------------|----------------------------|-----------------|---------------------|------------------------------|
| <b>Abbreviation</b>         | OP-8     | HPY-8              | HBPY-8              | CU-8   | SAPR-8           | TDD-8                   | JGBF-8                  | JETBPY-8                               | JBTPR-8                    | BTPR-8                     | JSD-8           | TT-8                | ETBPY-8                      |
| <b>Symmetry</b>             | $D_{8h}$ | $C_{7v}$           | $D_{6h}$            | $O_h$  | $D_{4d}$         | $D_{2d}$                | $D_{2d}$                | $D_{3h}$                               | $C_{2v}$                   | $C_{2v}$                   | $D_{2d}$        | $T_d$               | $D_{3h}$                     |
| <b>CShM<sub>(Yb1)</sub></b> | 30.795   | 23.452             | 15.768              | 9.149  | <b>0.908</b>     | 0.964                   | 15.191                  | 29.559                                 | 1.975                      | 1.545                      | 3.511           | 9.837               | 24.776                       |
| <b>CShM<sub>(Yb2)</sub></b> | 31.209   | 23.042             | 16.265              | 10.208 | <b>1.046</b>     | 1.348                   | 14.398                  | 29.538                                 | 1.854                      | 1.467                      | 3.696           | 10.822              | 24.783                       |

**Table S6.** Lanthanide geometry analysis of **2** by using the Shape software.

| Ideal shape                 | Heptagon | Hexagonal pyramid | Pentagonal bipyramid | Capped octahedron | Capped trigonal prism | Johnson pentagonal bipyramid | Johnson elongated triangular pyramid |
|-----------------------------|----------|-------------------|----------------------|-------------------|-----------------------|------------------------------|--------------------------------------|
| <b>Abbreviation</b>         | HP-7     | HPY-7             | PBPY-7               | COC-7             | CTPR-7                | JPBPY-7                      | JETPY-7                              |
| <b>Symmetry</b>             | $D_{7h}$ | $C_{6v}$          | $D_{5h}$             | $C_{3v}$          | $C_{2v}$              | $D_{5h}$                     | $C_{3v}$                             |
| <b>CShM<sub>(Yb1)</sub></b> | 29.927   | 20.493            | 5.498                | 2.386             | <b>0.765</b>          | 8.827                        | 18.763                               |
| <b>CShM<sub>(Yb2)</sub></b> | 34.464   | 22.027            | <b>1.691</b>         | 4.221             | 3.412                 | 5.729                        | 21.098                               |
| <b>CShM<sub>(Yb3)</sub></b> | 35.093   | 22.436            | <b>1.654</b>         | 4.566             | 3.634                 | 5.283                        | 20.054                               |
| <b>CShM<sub>(Yb4)</sub></b> | 28.923   | 20.508            | 6.730                | 2.202             | <b>0.709</b>          | 10.097                       | 18.401                               |

## Section 3 Experimental Section

**Materials and Characterization:** All chemicals and solvents were commercially purchased and used without further purification. C and N were performed on a PerkinElmer 2400 CHN elemental analyzer. Elemental analysis of Na, Yb, Se, and W were performed with a Leaman inductively coupled plasma (ICP) spectrometer. IR spectra were recorded on an Alpha Centauri FTIR spectrophotometer on pressed KBr pellets in the range 400~4000  $\text{cm}^{-1}$ . Water contents were determined by TG analyses on a PerkinElmer TGA7 instrument in flowing  $\text{N}_2$  with a heating rate of 10  $^\circ\text{C min}^{-1}$ . Electrospray ionization mass spectrometry was carried out on a Bruker Micro TOF-QII instrument. X-ray photoelectron spectroscopy was performed on a VG ESCALABMKII spectrometer with an  $\text{Mg}_{K\alpha}$  (1253.6 eV) achromatic X-ray source. The vacuum inside the analysis chamber was maintained at  $6.2 \times 10^{-6}$  Pa during the analysis. Magnetic measurements of the samples were performed on a Quantum Design PPMS-9. Data were corrected for the diamagnetic contribution calculated from Pascal constants.

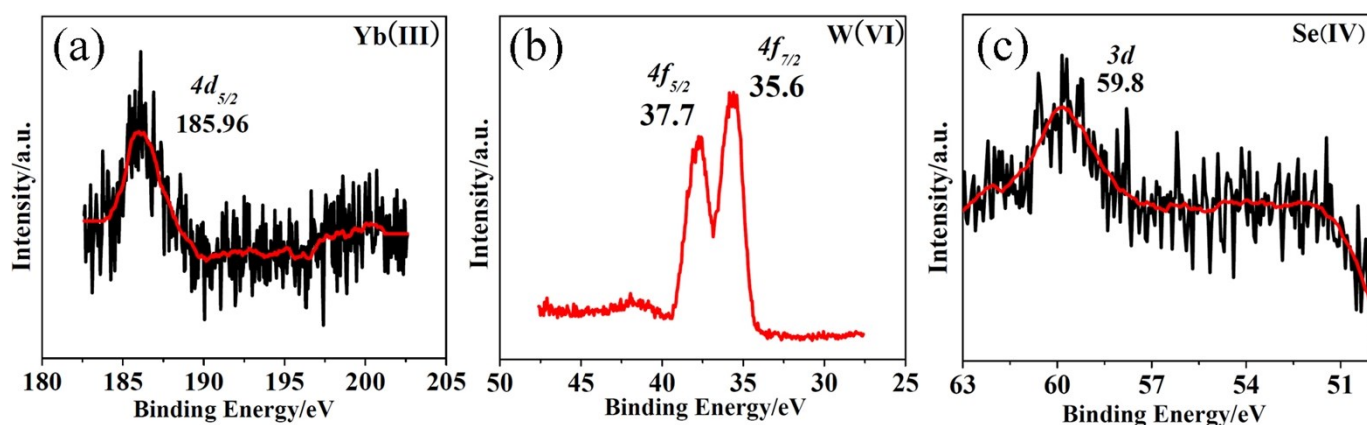

Fig. S7 Yb, W, and Se XPS spectra of 1.

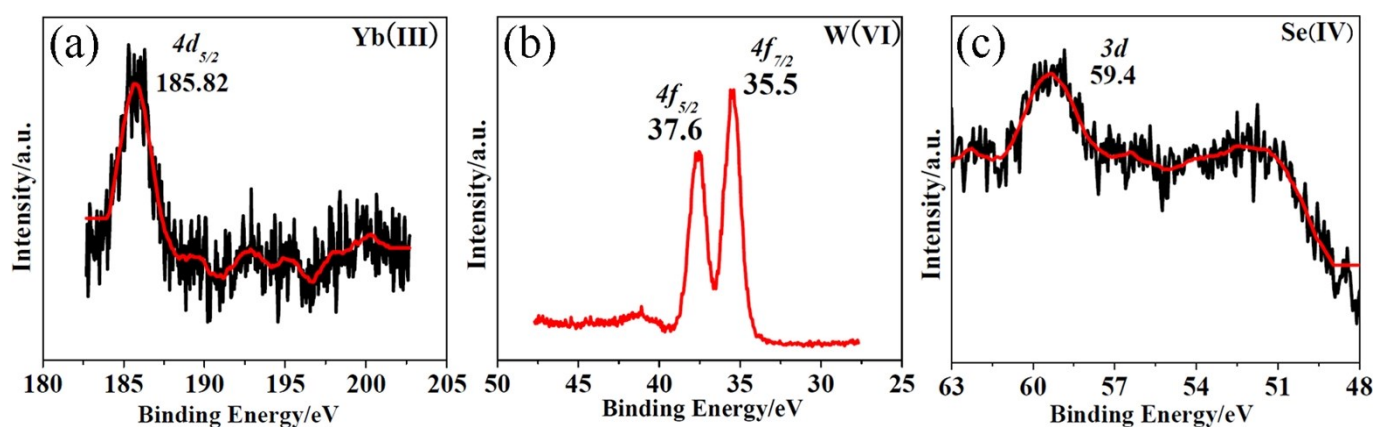

Fig. S8 Yb, W, and Se XPS spectra of 2.

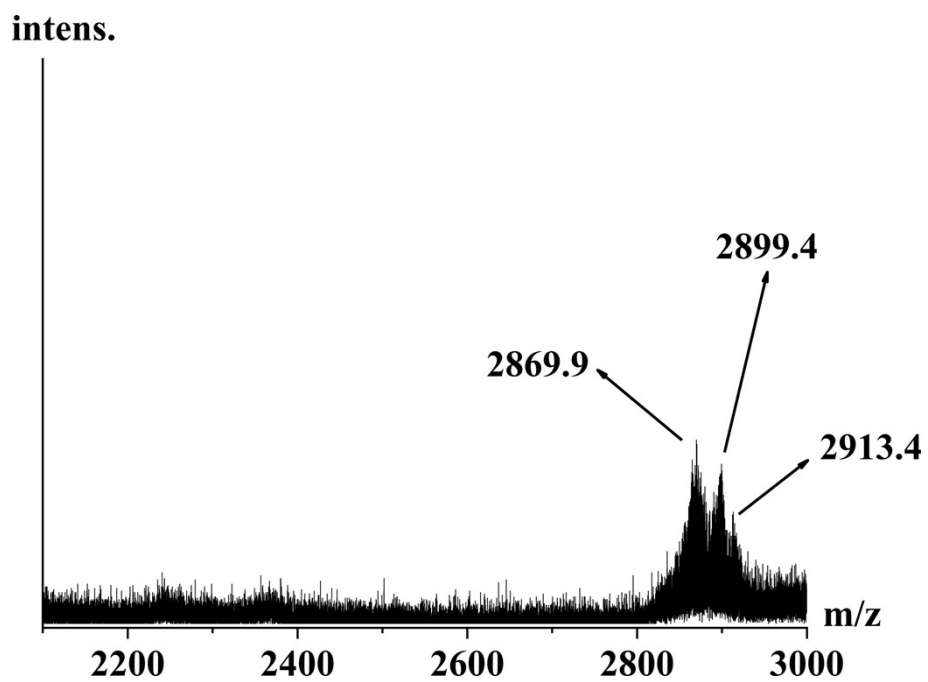

Fig. S9 ESI-MS of **1** in H<sub>2</sub>O.

Table S7. Assignment of peaks of **1**.

| Observed<br><i>m/z</i> | Calculated<br><i>m/z</i> | Charge | Molecular<br>mass | Polyanion                                                                                                                                                                         |
|------------------------|--------------------------|--------|-------------------|-----------------------------------------------------------------------------------------------------------------------------------------------------------------------------------|
| 2869.9                 | 2869.8                   | -2     | 5739.7            | {NaH <sub>10</sub> [Yb <sub>2</sub> Se <sub>2</sub> W <sub>21</sub> O <sub>76</sub> (H <sub>2</sub> O) <sub>6</sub> ](H <sub>2</sub> O)} <sup>2-</sup>                            |
| 2899.4                 | 2898.8                   | -2     | 5797.7            | {Na <sub>2</sub> H <sub>9</sub> [Yb <sub>2</sub> Se <sub>2</sub> W <sub>21</sub> O <sub>76</sub> (H <sub>2</sub> O) <sub>6</sub> ](H <sub>2</sub> O) <sub>3</sub> } <sup>2-</sup> |
| 2913.4                 | 2913.8                   | -2     | 5827.7            | {Na <sub>5</sub> H <sub>6</sub> [Yb <sub>2</sub> Se <sub>2</sub> W <sub>21</sub> O <sub>76</sub> (H <sub>2</sub> O) <sub>6</sub> ](H <sub>2</sub> O)} <sup>2-</sup>               |

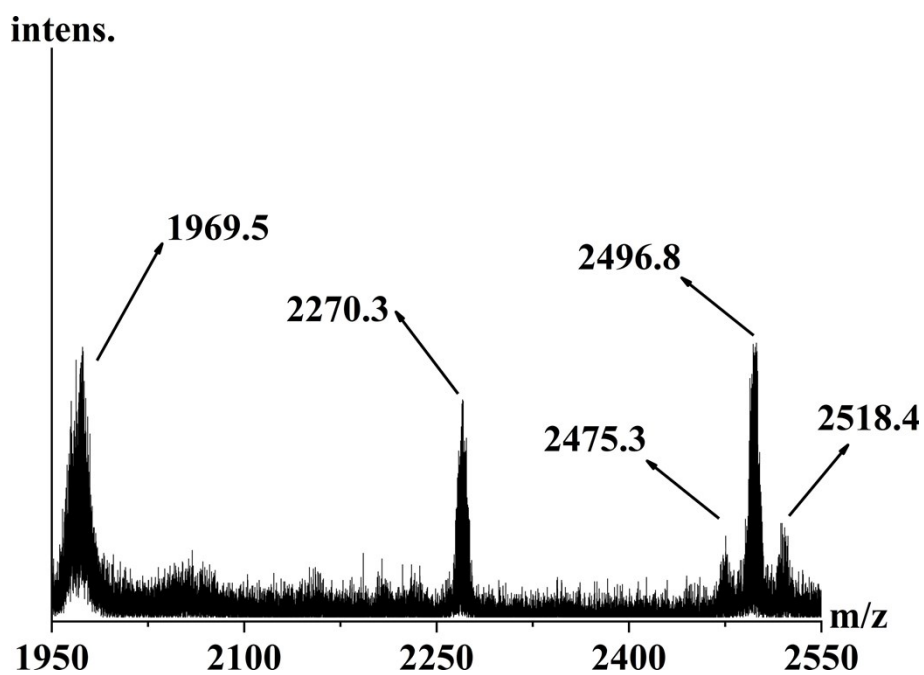

Fig. S10 ESI-MS of **2** in H<sub>2</sub>O.

Table S8. Assignment of peaks of **2**.

| Observed<br><i>m/z</i> | Calculated<br><i>m/z</i> | Charge | Molecular<br>mass | Polyanion                                                                                                                                                                              |
|------------------------|--------------------------|--------|-------------------|----------------------------------------------------------------------------------------------------------------------------------------------------------------------------------------|
| 1969.5                 | 1969.9                   | -2     | 3939.8            | {Na <sub>10</sub> [Se <sub>2</sub> W <sub>13</sub> O <sub>49</sub> (H <sub>2</sub> O)](H <sub>2</sub> O) <sub>20</sub> } <sup>2-</sup>                                                 |
| 2270.3                 | 2269.8                   | -2     | 4593.5            | {H <sub>3</sub> [Yb <sub>2</sub> Se <sub>2</sub> W <sub>16</sub> O <sub>55</sub> (OH) <sub>5</sub> (H <sub>2</sub> O) <sub>6</sub> ](H <sub>2</sub> O)} <sup>2-</sup>                  |
| 2475.3                 | 2474.7                   | -2     | 4949.5            | {Na <sub>8</sub> H <sub>3</sub> [Yb <sub>2</sub> Se <sub>2</sub> W <sub>16</sub> O <sub>61</sub> (OH)(H <sub>2</sub> O) <sub>4</sub> ](H <sub>2</sub> O) <sub>14</sub> } <sup>2-</sup> |
| 2496.8                 | 2496.7                   | -2     | 4993.5            | {Na <sub>10</sub> H[Yb <sub>2</sub> Se <sub>2</sub> W <sub>16</sub> O <sub>61</sub> (OH)(H <sub>2</sub> O) <sub>4</sub> ](H <sub>2</sub> O) <sub>14</sub> } <sup>2-</sup>              |
| 2518.4                 | 2517.7                   | -2     | 5035.5            | {Na <sub>7</sub> H <sub>4</sub> [Yb <sub>2</sub> Se <sub>2</sub> W <sub>16</sub> O <sub>61</sub> (OH)(H <sub>2</sub> O) <sub>4</sub> ](H <sub>2</sub> O) <sub>20</sub> } <sup>2-</sup> |

## Supplementary Magnetic Characterizations

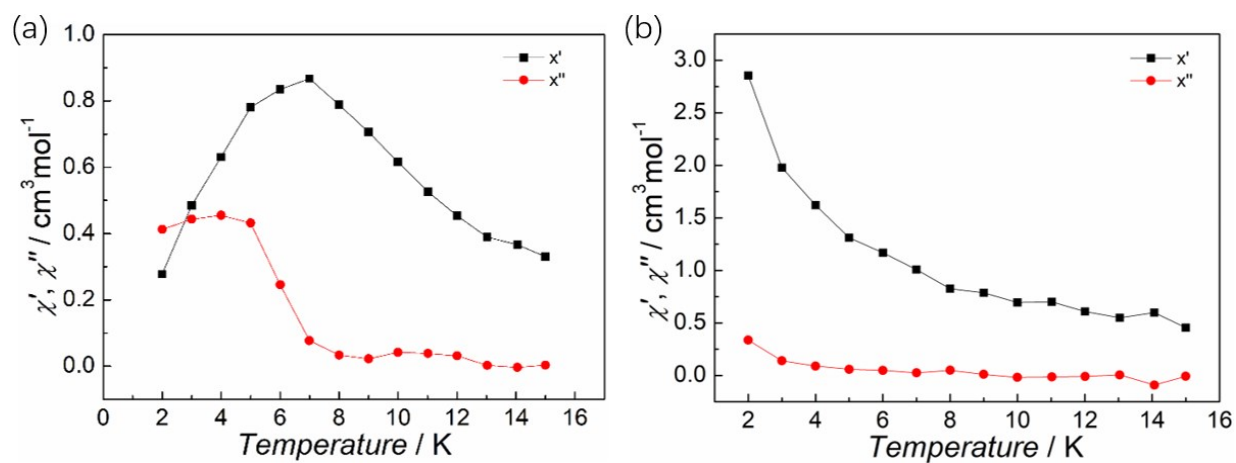

**Fig. S11** Temperature dependences of the in-phase  $\chi'$  and out-of-phase  $\chi''$  components of the ac susceptibility of **1** (a) and **2** (b) under an applied external dc field (2000 Oe) and a constant frequency (1000 Hz).

**Table S9.** Best fitted parameters ( $\chi_T$ ,  $\chi_S$ ,  $\tau$  and  $\alpha$ ) with the generalized Debye model at 2000 Oe in the temperature range 2.5-8.0 K.

| $T / \text{K}$ | $\chi_T / \text{cm}^3 \text{mol}^{-1}$ | $\chi_S / \text{cm}^3 \text{mol}^{-1}$ | $\alpha$ | $\tau / \text{s}$ | $R^2$   |
|----------------|----------------------------------------|----------------------------------------|----------|-------------------|---------|
| 2.5            | 2.24403                                | 0.098                                  | 0.1609   | 9.13E-4           | 0.99687 |
| 3.0            | 2.08831                                | 0.07656                                | 0.1934   | 7.73E-4           | 0.9968  |
| 3.5            | 1.65605                                | 0.07605                                | 0.16133  | 4.47E-4           | 0.99592 |
| 4.0            | 1.38421                                | 0.07609                                | 0.11797  | 2.69E-4           | 0.98021 |
| 4.5            | 1.3633                                 | 0.05347                                | 0.16531  | 2.19E-4           | 0.99759 |
| 5.0            | 1.12435                                | 0.05704                                | 0.11207  | 1.21E-4           | 0.9951  |
| 5.5            | 1.00169                                | 0.06425                                | 0.07498  | 7.43E-5           | 0.98155 |
| 6.0            | 0.93273                                | 0.03324                                | 0.10738  | 4.62E-5           | 0.98547 |
| 6.5            | 0.86314                                | 0.02348                                | 0.11418  | 2.94E-5           | 0.97896 |
| 7.0            | 0.78638                                | 0.03337                                | 0.0821   | 1.88E-5           | 0.9777  |
| 7.5            | 0.73609                                | 0.01246                                | 0.09245  | 1.25E-5           | 0.99333 |
| 8.0            | 0.69379                                | 0.02271                                | 0.09694  | 9.10E-6           | 0.99565 |



## Section 4 Supplementary Physical Characterizations

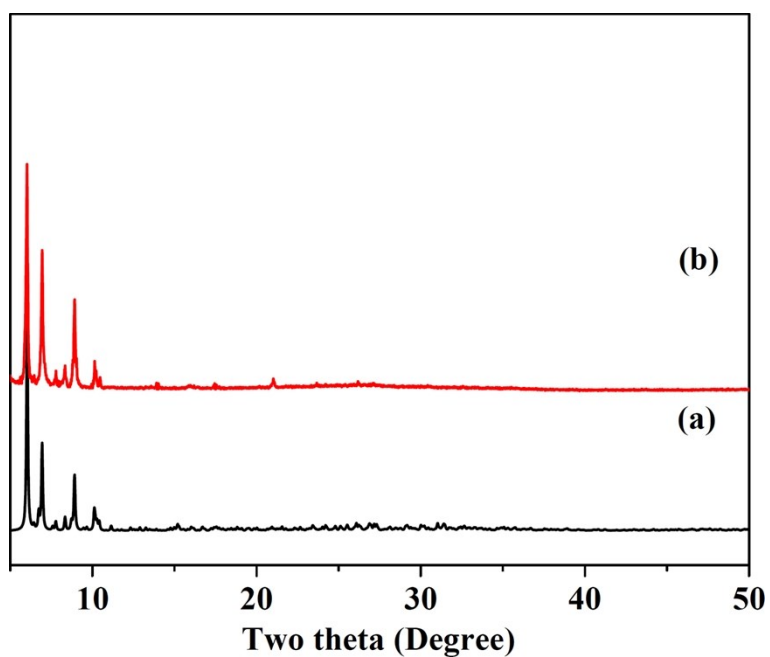

**Fig. S12** The XRPD patterns of **1**: as-synthesized (b) and simulated (a).

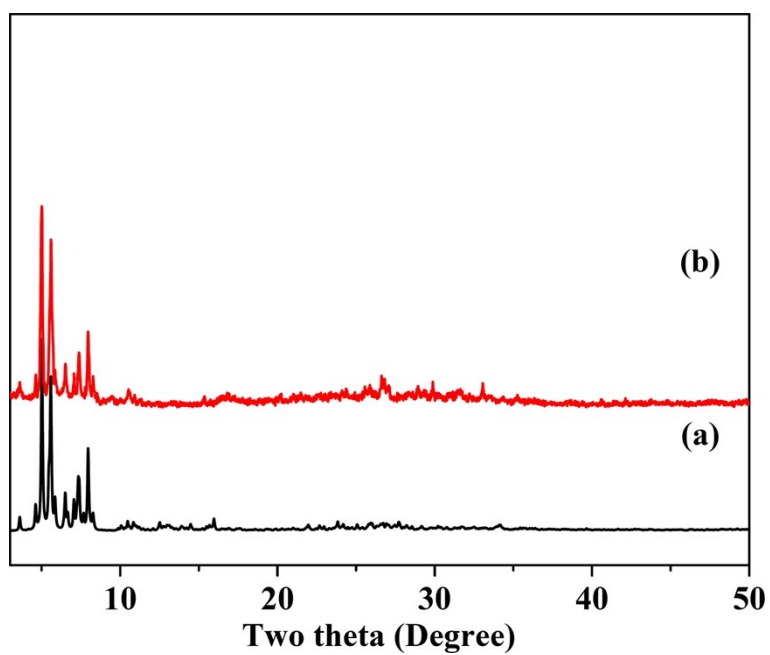

**Fig. S13** The XRPD patterns of **2**: as-synthesized (b) and simulated (a).

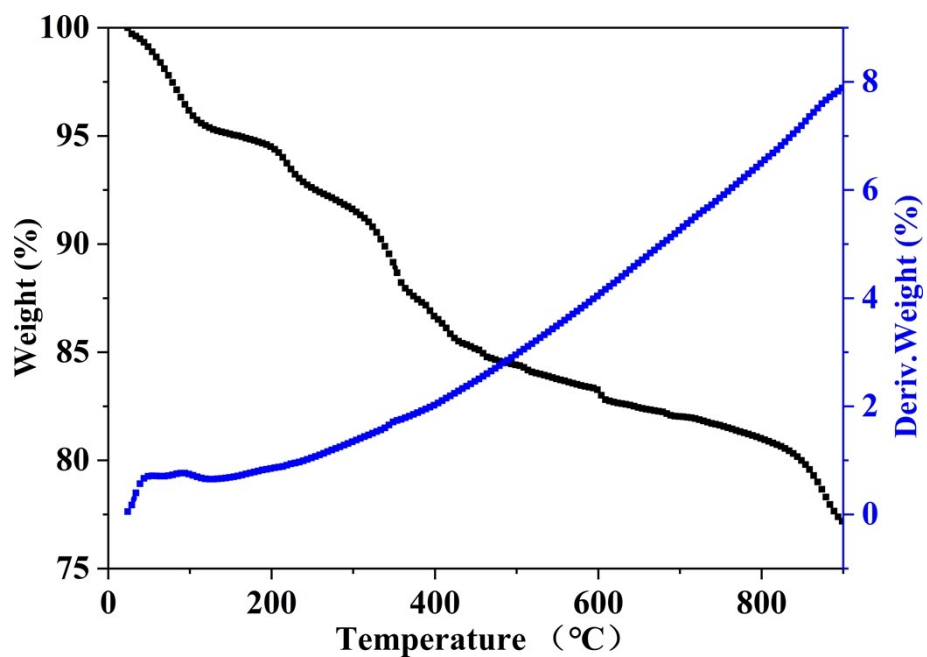

**Fig. S14** TGA and DTA curves of **1**. The first and second weight loss is the lost of water molecules and organic amine groups (8.93 %). Then the structure begins to decompose.

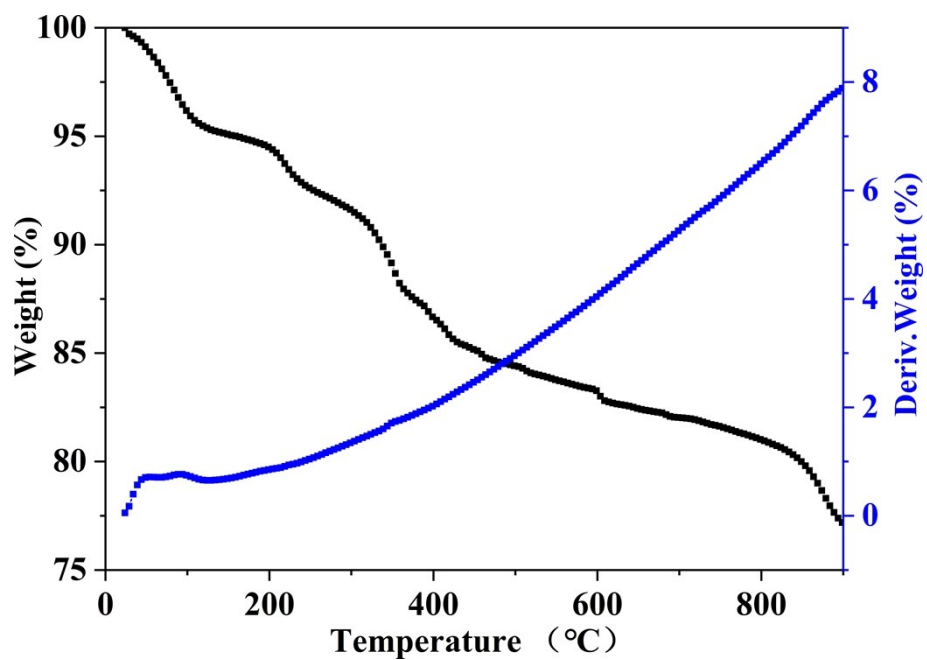

**Fig. S15** TGA and DTA curves of **2**. The first and second weight loss is the lost of water molecules and organic amine groups (7.82 %). Then the structure begins to decompose.
